# Supplementary material for: A nitridation route to construct high-activity interfaces toward alkaline hydrogen evolution
Source: Royal Society of Chemistry journal article supplement (doi:10.1039/d2ta02294j), 2022-01-01
Supplement: d2ta02294j1.pdf [file d2ta02294j1.pdf]

## A nitridation route to construct high-activity interfaces toward alkaline hydrogen evolution

Yihan Feng,<sup>a,b</sup> Xunlu Wang,<sup>a,b</sup> Jiacheng Wang <sup>\*a,b</sup>

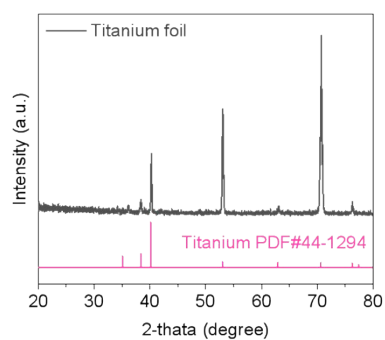

**Fig. S1** XRD pattern of Ti foil.

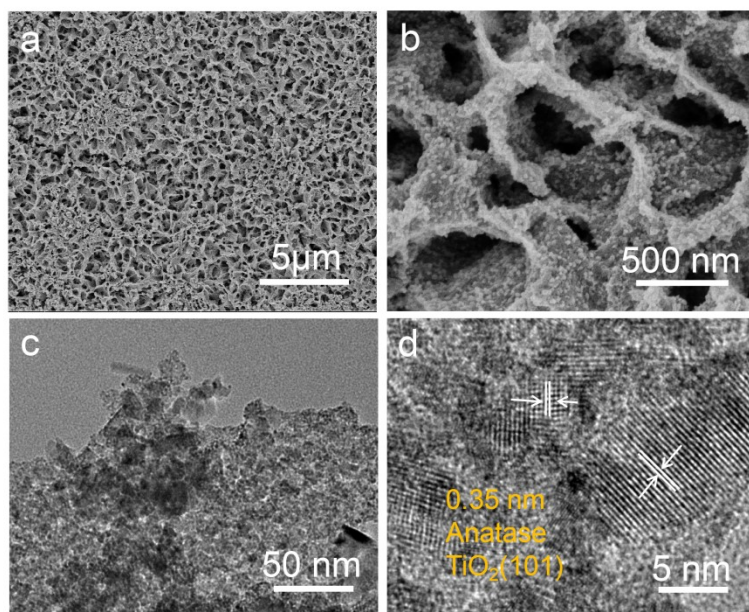

Fig. S2 SEM images of Ru/H<sub>2</sub>Ti<sub>2</sub>O<sub>5</sub> NBs.

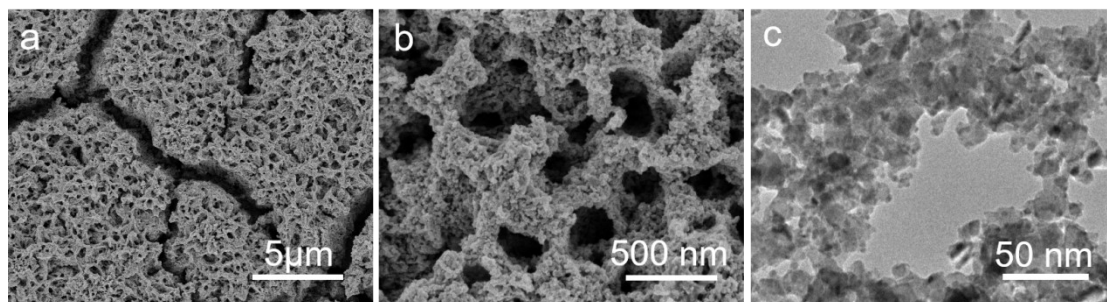

Fig. S3 SEM images of TiO<sub>x</sub>N<sub>y</sub> NBs.

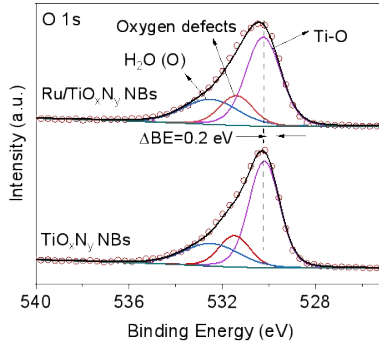

Fig. S4 The XPS spectra of O1s for Ru/TiO<sub>x</sub>N<sub>y</sub>, TiO<sub>x</sub>N<sub>y</sub> and Ru/H<sub>2</sub>Ti<sub>2</sub>O<sub>5</sub> NBs.

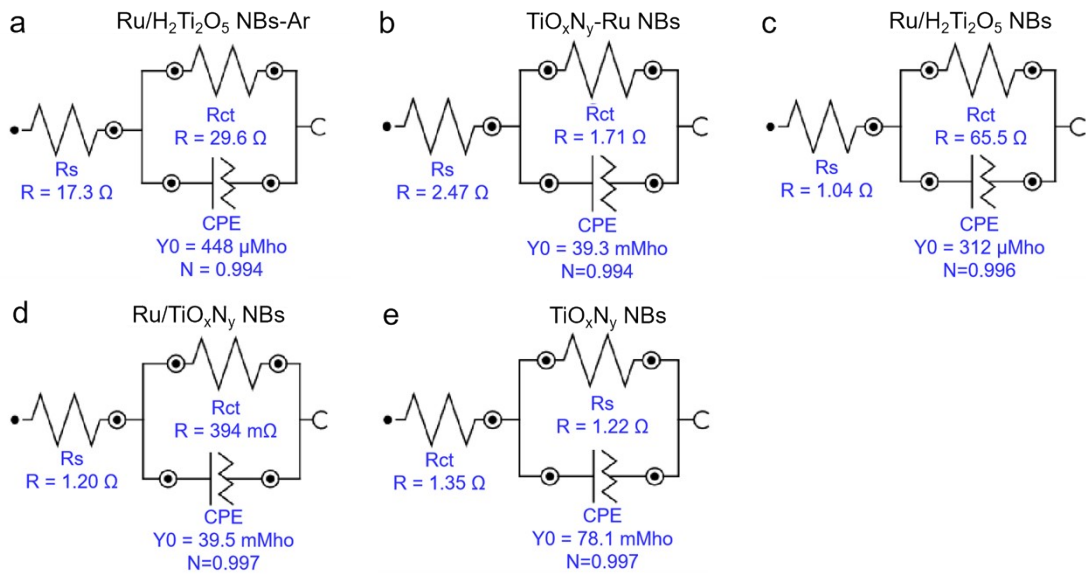

Fig. S5 The equivalent circuits and the fitted  $R_s$  and  $R_{ct}$  values for Ru/TiO<sub>x</sub>N<sub>y</sub> NBs and other electrocatalysts.

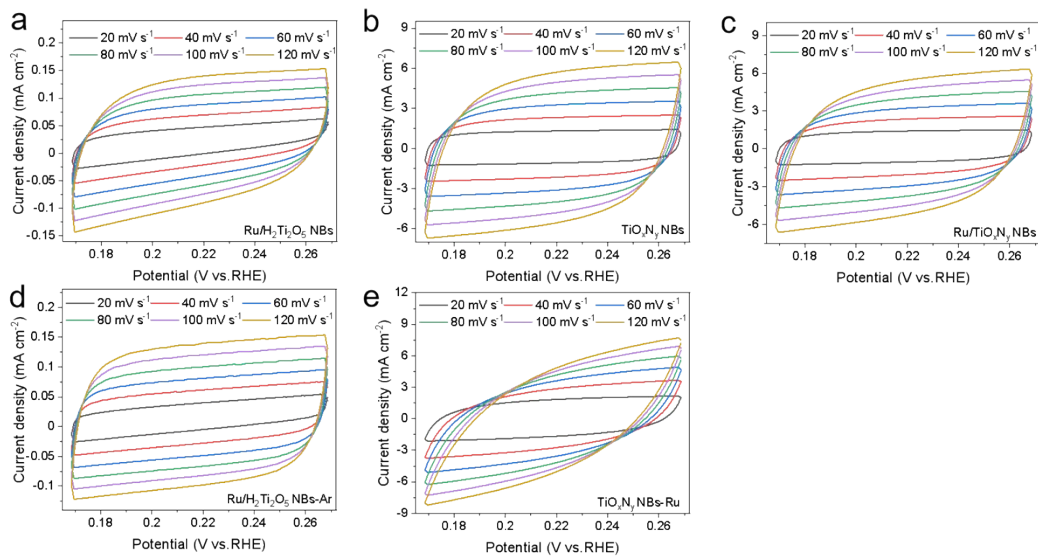

**Fig. S6** CV curves of Ru/TiO<sub>x</sub>N<sub>y</sub> NBs and other electrocatalysts in the non-faradic regions.

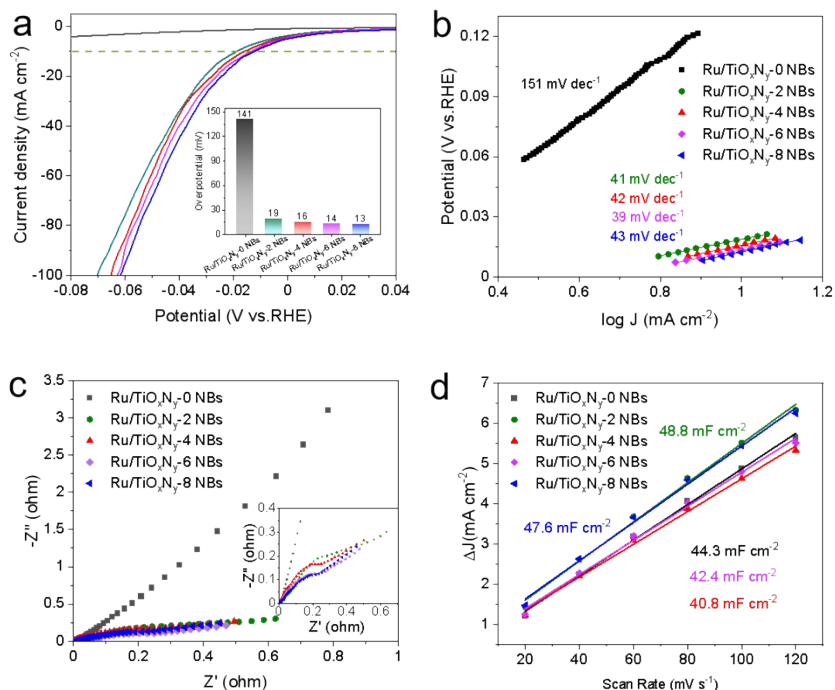

**Fig. S7** Electrochemical measurements of Ru/TiO<sub>x</sub>N<sub>y</sub>-X (X mg, X = 0, 2, 4, 6 and 8) NBs. (a) Polarization curves of as-prepared electrocatalysts in 1 M KOH solution. (b) Tafel plots of these electrocatalysts. (c) The EIS spectra and (d) the  $C_{dl}$  calculations of these electrocatalysts.

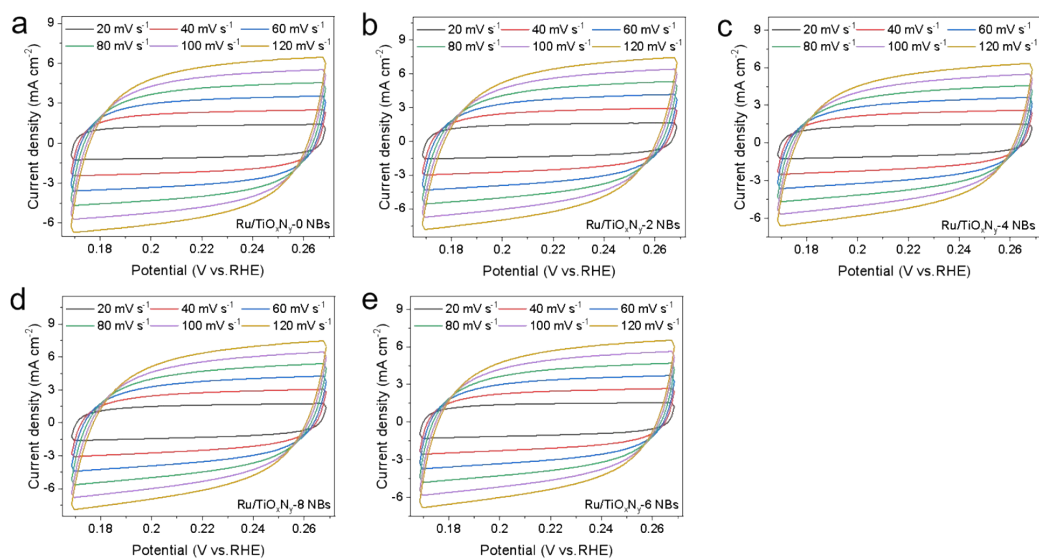

**Fig. S8** CV curves of Ru/TiO<sub>x</sub>N<sub>y</sub>-X (X= mg X= 0, 2, 4, 6 and 8) NBs in the non-faradic regions.

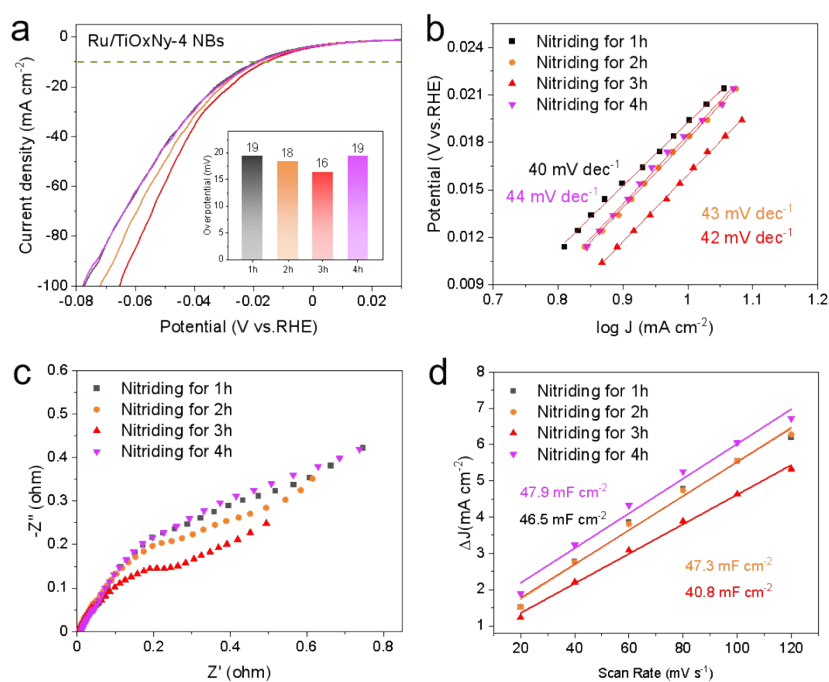

**Fig.S9** Electrochemical measurements of Ru/H<sub>2</sub>Ti<sub>2</sub>O<sub>5</sub> NBs with different nitride time (X h, X= 1, 2, 3 and 4 h) NBs. (a) Polarization curves of as-prepared electrocatalysts in 1 M KOH solution. (b) Tafel plots of these electrocatalysts. (c) The EIS spectra and (d) the C<sub>dl</sub> calculations of these electrocatalysts.

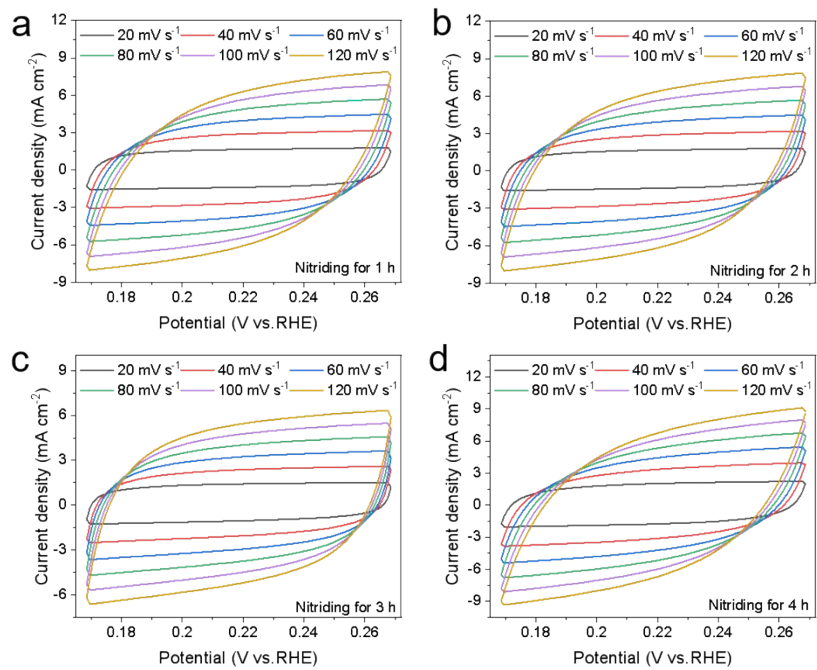

**Fig.S10** CV curves of Ru/H<sub>2</sub>Ti<sub>2</sub>O<sub>5</sub> NBs with different nitride time in the non-faradic regions.

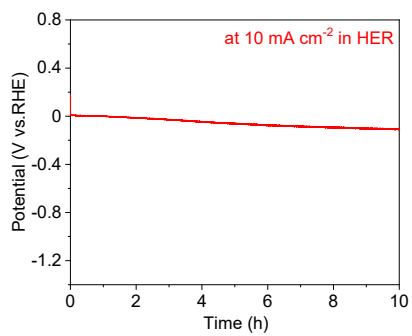

**Fig.S11** Long-term stability test of Ru/TiO<sub>x</sub>N<sub>y</sub> NBs at 10 mA cm<sup>-2</sup>.



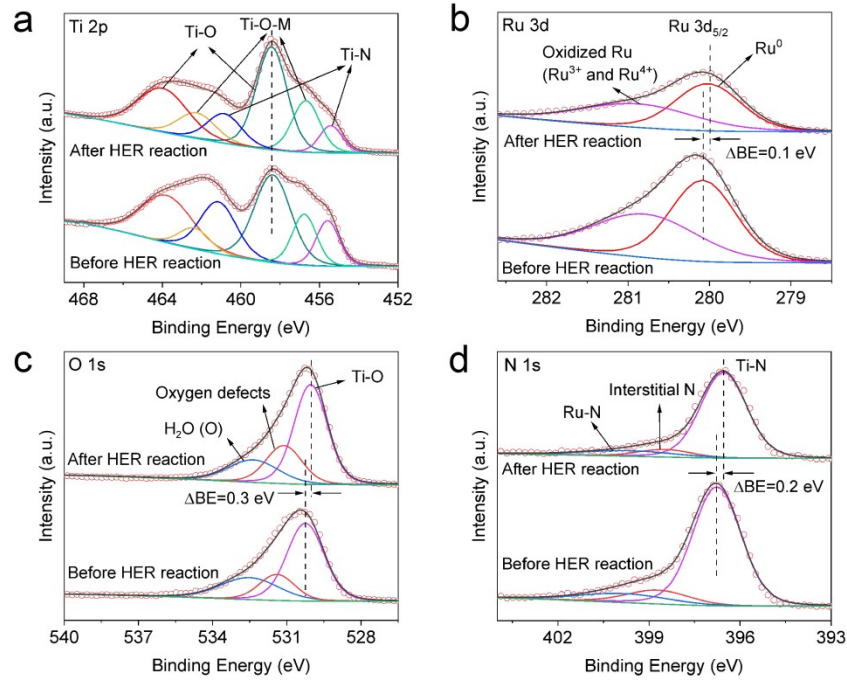

Fig. S12 High-resolution XPS of (a) Ti 2p, (b) Ru 3d, (c) O 1s and (d) N 1s for Ru/Ti<sub>x</sub>N<sub>y</sub> NBs after stability test.

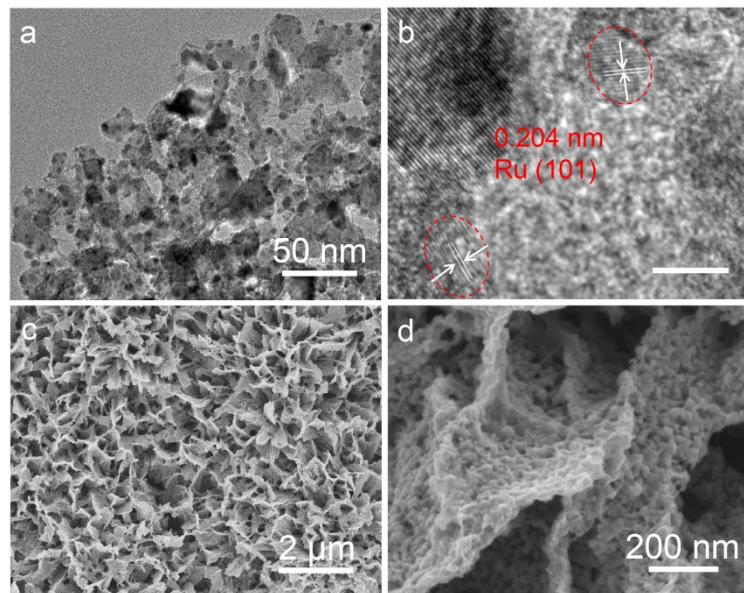

Fig. S13 TEM (a, b) and SEM (c, d) images of Ru/Ti<sub>x</sub>N<sub>y</sub> NBs after stability test.

**Table S1.** Comparison of HER performance for some recently reported electrocatalysts in alkaline electrolytes.

| Electrocatalysts                           | Electrolytes | Overpotential (mV)                | Tafel slope               | Reference |
|--------------------------------------------|--------------|-----------------------------------|---------------------------|-----------|
| Ru/TiO <sub>x</sub> N <sub>y</sub>         | 1.0 M KOH    | 16 mV at 10 mA cm <sup>-2</sup>   | 42 mV dec <sup>-1</sup>   | This work |
| RuCr@C                                     | 1.0 M KOH    | 19 mV at 10 mA cm <sup>-2</sup>   | 24 mV dec <sup>-1</sup>   | 1         |
| Ru-CoP/CC                                  | 1.0 M KOH    | 21 mV at 10 mA cm <sup>-2</sup>   | 49 mV dec <sup>-1</sup>   | 2         |
| Ru@Ni-MOF                                  | 1.0 M KOH    | 22 mV at 10 mA cm <sup>-2</sup>   | 40 mV dec <sup>-1</sup>   | 3         |
| hybrid RuCoP clusters                      | 1.0 M KOH    | 23 mV at 10 mA cm <sup>-2</sup>   | 37 mV dec <sup>-1</sup>   | 4         |
| RuAu SAAs                                  | 1.0 M KOH    | 24 mV at 10 mA cm <sup>-2</sup>   | 37 mV dec <sup>-1</sup>   | 5         |
| Ru MNSs                                    | 1.0 M KOH    | 24 mV at 10 mA cm <sup>-2</sup>   | ~33 mV dec <sup>-1</sup>  | 6         |
| Ru <sub>2</sub> -GC                        | 1.0 M KOH    | 25 mV at 10 mA cm <sup>-2</sup>   | 65 mV dec <sup>-1</sup>   | 7         |
| Ru-MoS <sub>2</sub> -Mo <sub>2</sub> C/TiN | 1.0 M KOH    | 25 mV at 10 mA cm <sup>-2</sup>   | 58 mV dec <sup>-1</sup>   | 8         |
| Pt-NC/Ni-MOF                               | 1.0 M KOH    | 25 mV at 10 mA cm <sup>-2</sup>   | 41.2 mV dec <sup>-1</sup> | 9         |
| P-Ru-CoNi-LDH                              | 1.0 M KOH    | 29 mV at 10 mA cm <sup>-2</sup>   | 69 mV dec <sup>-1</sup>   | 10        |
| Ru/Co <sub>3</sub> O <sub>4</sub>          | 1.0 M KOH    | 31 mV at 10 mA cm <sup>-2</sup>   | 69.8 mV dec <sup>-1</sup> | 11        |
| Ru-NiCo <sub>2</sub> S <sub>4</sub>        | 1.0 M KOH    | 32 mV at 10 mA cm <sup>-2</sup>   | 41.3 mV dec <sup>-1</sup> | 12        |
| RuRh-Co                                    | 1.0 M KOH    | 32 mV at 20 mA cm <sup>-2</sup>   | 31 mV dec <sup>-1</sup>   | 13        |
| CC@WS <sub>2</sub> /Ru-450                 | 1.0 M KOH    | 32.1 mV at 10 mA cm <sup>-2</sup> | 53.2 mV dec <sup>-1</sup> | 14        |
| Ru-HMT-MP-7                                | 1.0 M KOH    | 33 mV at 10 mA cm <sup>-2</sup>   | 26.4 mV dec <sup>-1</sup> | 15        |
| RuNi-NCNFs                                 | 1.0 M KOH    | 35 mV at 10 mA cm <sup>-2</sup>   | 30 mV dec <sup>-1</sup>   | 16        |
| A-CoPt-NC                                  | 1.0 M KOH    | 50 mV at 10 mA cm <sup>-2</sup>   | —                         | 17        |
| Rh/NiFeRh LDH                              | 1.0 M KOH    | 57 mV at 10 mA cm <sup>-2</sup>   | 81.3 mV dec <sup>-1</sup> | 18        |
| Sr <sub>2</sub> RuO <sub>4</sub>           | 0.1 M KOH    | 61 mV at 10 mA cm <sup>-2</sup>   | 51 mV dec <sup>-1</sup>   | 19        |
| PtO <sub>2</sub> -CoOOH/TM                 | 1.0 M KOH    | 65.1 mV at 70 mA cm <sup>-2</sup> | 39 mV dec <sup>-1</sup>   | 20        |
| Ni-MOF@Pt                                  | 1.0 M KOH    | 102 mV at 10 mA cm <sup>-2</sup>  | 88 mV dec <sup>-1</sup>   | 21        |
| CuPor-RuN <sub>3</sub>                     | 1.0 M KOH    | 114 mV at 10 mA cm <sup>-2</sup>  | —                         | 22        |
| Ru/NiFe LDH-F/NF                           | 1.0 M KOH    | 115 mV at 10 mA cm <sup>-2</sup>  | 87.1 mV dec <sup>-1</sup> | 23        |
| Ni <sub>3</sub> P <sub>4</sub> -Ru         | 1.0 M KOH    | 123 mV at 10 mA cm <sup>-2</sup>  | 56.7 mV dec <sup>-1</sup> | 24        |
| Pt <sub>1</sub> -Mo <sub>2</sub> C-C       | 1.0 M KOH    | 155 mV at 10 mA cm <sup>-2</sup>  | 92 mV dec <sup>-1</sup>   | 25        |



## References

- 1 F. Bao, Z. Yang, Y. Yuan, P. Yu, G. Zeng, Y. Cheng, Y. Lu, J. Zhang and H. Huang, *Adv. Funct. Mater.*, 2021, **32**, 2108991.
- 2 X. Xiao, X. Wang, B. Li, X. Jiang, Y. Zhang, M. Li, S. Song, S. Chen, M. Wang, Y. Shen and Z. Ren, *Mater. Today Phys.*, 2020, **12**, 100182.
- 3 L. Deng, F. Hu, M. Ma, S. C. Huang, Y. Xiong, H. Y. Chen, L. Li and S. Peng, *Angew. Chem. Int. Ed. Engl.*, 2021, **60**, 22276-22282.
- 4 J. Xu, T. Liu, J. Li, B. Li, Y. Liu, B. Zhang, D. Xiong, I. Amorim, W. Li and L. Liu, *Energ. Environ. Sci.*, 2018, **11**, 1819-1827.
- 5 C. H. Chen, D. Wu, Z. Li, R. Zhang, C. G. Kuai, X. R. Zhao, C. K. Dong, S. Z. Qiao, H. Liu and X. W. Du, *Adv. Energy Mater.*, 2019, **9**, 1803913.
- 6 J. Zhang, X. Mao, S. Wang, L. Liang, M. Cao, L. Wang, G. Li, Y. Xu, X. Huang, *Angew. Chem. Int. Ed. Engl.*, 2022, e202116867.
- 7 J. Creus, S. Drouet, S. Suriñach, P. Lecante, V. Collière, R. Poteau, K. Philippot, J. García-Antón and X. Sala, *ACS Catal.*, 2018, **8**, 11094-11102.
- 8 V. H. Hoa, D. T. Tran, S. Prabhakaran, D. H. Kim, N. Hameed, H. Wang, N. H. Kim and J. H. Lee, *Nano Energy*, 2021, **88**, 106277.
- 9 C. Guo, Y. Jiao, Y. Zheng, J. Luo, K. Davey and S.-Z. Qiao, *Chem*, 2019, **5**, 2429-2441.
- 10 Q. Li, F. Huang, S. Li, H. Zhang and X. Y. Yu, *Small*, 2022, **18**, e2104323.
- 11 Z. Liu, L. Zeng, J. Yu, L. Yang, J. Zhang, X. Zhang, F. Han, L. Zhao, X. Li, H. Liu and W. Zhou, *Nano Energy*, 2021, **85**, 105940.
- 12 H. Su, S. Song, Y. Gao, N. Li, Y. Fu, L. Ge, W. Song, J. Liu and T. Ma, *Adv. Funct. Mater.*, 2021, 2109731.
- 13 Y. Cui, Z. Xu, D. Chen, T. Li, H. Yang, X. Mu, X. Gu, H. Zhou, S. Liu and S. Mu, *Nano Energy*, 2021, **90**, 106579.
- 14 J. Li, Y. Li, J. Wang, C. Zhang, H. Ma, C. Zhu, D. Fan, Z. Guo, M. Xu, Y. Wang and H. Ma, *Adv. Funct. Mater.*, 2022, 2109439.
- 15 Y. Zhao, X. Zhang, Y. Gao, Z. Chen, Z. Li, T. Ma, Z. Wu, L. Wang and S. Feng, *Small*, 2022, e2105168.
- 16 M. Li, H. Wang, W. Zhu, W. Li, C. Wang and X. Lu, *Adv. Sci.*, 2020, **7**, 1901833.
- 17 L. Zhang, Y. Jia, H. Liu, L. Zhuang, X. Yan, C. Lang, X. Wang, D. Yang, K. Huang, S. Feng and X. Yao, *Angew. Chem. Int. Ed. Engl.*, 2019, **58**, 9404-9408.
- 18 B. Zhang, C. Zhu, Z. Wu, E. Stavitski, Y. H. Lui, T. H. Kim, H. Liu, L. Huang, X. Luan, L. Zhou, K. Jiang, W. Huang, S. Hu, H. Wang and J. S. Francisco, *Nano Lett.*, 2020, **20**, 136-144.
- 19 Y. Zhu, H. A. Tahini, Z. Hu, J. Dai, Y. Chen, H. Sun, W. Zhou, M. Liu, S. C. Smith, H. Wang and Z. Shao, *Nat. Commun.*, 2019, **10**, 149.
- 20 Z. Wang, X. Ren, X. Shi, Abdullah M. Asiri, L. Wang, X. Li, X. Sun, Q. Zhang and H. Wang, *J. Mater. Chem. A*, 2018, **6**, 3864-3868.
- 21 K. Rui, G. Zhao, M. Lao, P. Cui, X. Zheng, X. Zheng, J. Zhu, W. Huang, S. X. Dou and W. Sun, *Nano Lett*, 2019, **19**, 8447-8453.
- 22 J. Jiang, F. Sun, S. Zhou, W. Hu, H. Zhang, J. Dong, Z. Jiang, J. Zhao, J. Li, W. Yan and M. Wang, *Nat. Commun.*, 2018, **9**, 2885.
- 23 Y. Wang, P. Zheng, M. Li, Y. Li, X. Zhang, J. Chen, X. Fang, Y. Liu, X. Yuan, X. Dai and H. Wang, *Nanoscale*, 2020, **12**, 9669-9679.
- 24 Q. He, D. Tian, H. Jiang, D. Cao, S. Wei, D. Liu, P. Song, Y. Lin and L. Song, *Adv. Mater.*, 2020, **32**, e1906972.
- 25 S. Niu, J. Yang, H. Qi, Y. Su, Z. Wang, J. Qiu, A. Wang and T. Zhang, *J. Energy Chem.*, 2021, **57**, 371-377.
